# Supplementary material for: Changes in the Risk of Stroke in Dialysis Patients: A Retrospective Analysis over the Last 40 Years
Source: MDPI journal article supplement (doi:10.3390/toxins13050350), 2021-05-13
Supplement: s1 [file s1]

# Changes in the Risk of Stroke in Dialysis Patients: A Retrospective Analysis over the Last 40 Years

Toshiya Aono, Yuki Shinya, Satoru Miyawaki, Takehiro Sugiyama, Isao Kumagai, Atsumi Takenobu, Masahiro Shin, Nabuhito Saito and Akira Teraoka

**Table S1.** Clinical characteristics of patients in each period of dialysis initiation.

|                                                | HD              | Online HDF      | <i>p</i> Value |
|------------------------------------------------|-----------------|-----------------|----------------|
| Number of patients, n                          | 222             | 69              | /              |
| Age at initiation of dialysis                  |                 |                 |                |
| Mean $\pm$ SD                                  | 68.3 $\pm$ 13.1 | 56.6 $\pm$ 15.0 | <0.001*        |
| Range (years)                                  | 27–95           | 21–88           |                |
| Follow-up period (years)                       |                 |                 |                |
| Mean $\pm$ SD                                  | 7.4 $\pm$ 7.5   | 10.5 $\pm$ 8.4  | 0.002*         |
| Range (years)                                  | 0.1–38.3        | 0.3–36.2        |                |
| Male, n (%)                                    | 139 (62.6%)     | 48 (69.6%)      | 0.293          |
| Underlying diseases, n (%)                     |                 |                 |                |
| Hypertension                                   | 214 (96.4%)     | 69 (100.0%)     | 0.110          |
| Diabetes                                       | 145 (65.3%)     | 32 (46.4%)      | 0.005*         |
| Dyslipidemia                                   | 86 (38.7%)      | 28 (40.6%)      | 0.784          |
| Ischemic heart diseases                        | 109 (49.1%)     | 23 (33.3%)      | 0.022*         |
| Arteriosclerosis obliterans                    | 70 (31.5%)      | 22 (31.9%)      | 0.956          |
| Atrial fibrillation                            | 27 (30.3%)      | 4 (36.4%)       | 0.684          |
| Smoking, n (%)                                 | 74 (33.3%)      | 36 (52.2%)      | 0.005*         |
| Alcohol, n (%)                                 | 33 (14.9%)      | 18 (26.1%)      | 0.032*         |
| Antiplatelet therapy, n (%)                    | 117 (52.7%)     | 31 (44.9%)      | 0.259          |
| Anticoagulant therapy, n (%)                   | 30 (13.5%)      | 5 (7.3%)        | 0.162          |
| Primary renal diagnosis of the patients, n (%) |                 |                 |                |
| Diabetic nephropathy                           | 94 (42.3%)      | 22 (31.9%)      |                |
| Nephrosclerosis                                | 64 (28.8%)      | 11 (15.9%)      |                |
| Glomerulonephritis                             | 32 (14.4%)      | 12 (17.4%)      | <0.001*        |
| Polycystic kidney disease                      | 9 (4.1%)        | 2 (2.9%)        |                |
| Others                                         | 23 (10.4%)      | 22 (31.9%)      |                |
| Laboratory parameters                          |                 |                 |                |
| CRP (mg/dL)                                    |                 |                 |                |
| Mean $\pm$ SD                                  | 1.16 $\pm$ 3.66 | 0.35 $\pm$ 1.22 | 0.007*         |
| Range (mg/dL)                                  | 0.00–30.98      | 0.00–9.90       |                |
| PTH (pg/mL)                                    |                 |                 |                |
| Mean $\pm$ SD                                  | 185 $\pm$ 191   | 179 $\pm$ 120   | 0.464          |
| Range (pg/mL)                                  | 5–1842          | 10–537          |                |
| Kt/V                                           |                 |                 |                |
| Mean $\pm$ SD                                  | 1.26 $\pm$ 0.33 | 1.32 $\pm$ 0.31 | 0.208          |
| Range                                          | 0.48–2.21       | 0.52–2.16       |                |
| URR (%)                                        |                 |                 |                |

|               |                 |                |        |
|---------------|-----------------|----------------|--------|
| Mean $\pm$ SD | 62.0 $\pm$ 10.8 | 65.7 $\pm$ 9.3 | 0.026* |
| Range (%)     | 26.7–84.3       | 35.6–93.9      |        |

n, number; SD, standard deviation; HDF, hemodialysis filtration; CRP, C-reactive protein; PTH, parathyroid hormone; Kt/V, K dialyzer clearance of urea, t dialysis time, V volume of distribution of urea; URR, urea reduction ratio.

\* Values of  $p < 0.05$  are considered statistically significant.
